# Supplementary material for: Novel mixed 1D–2D lanthanide coordination polymers based on p-sulfonatocalix[4]arene and 4,4′-bipyridine-N,N′-dioxide where p-sulfonatocalix[4]arene acts as a guest
Source: Royal Society of Chemistry journal article supplement (doi:10.1039/c5ce00153f), 2015-01-01
Supplement: c5ce00153f1.pdf [file c5ce00153f1.pdf]

SUPPORTING INFORMATION

*Novel mixed 1D-2D lanthanide coordination polymers based on p-sulfonatocalix[4]arene and 4,4'-bipyridine-N,N'-dioxide where p-sulfonatocalix[4]arene acts as a guest*

**Ahmad Husain and Clive L. Oliver\***

*Centre for Supramolecular Chemistry Research, Department of Chemistry, University of Cape Town, Rondebosch, 7701, South Africa*

E-mail: [Clive.Oliver@uct.ac.za](mailto:Clive.Oliver@uct.ac.za) (Dr. Clive L. Oliver)

**\*Corresponding author:**

Clive L. Oliver

Centre for Supramolecular Chemistry Research, Department of Chemistry, University of Cape Town, Rondebosch 7701, South Africa

E-mail: [clive.oliver@uct.ac.za](mailto:clive.oliver@uct.ac.za)

Fax: +27 21 6505195

Phone: +27 21 6503830

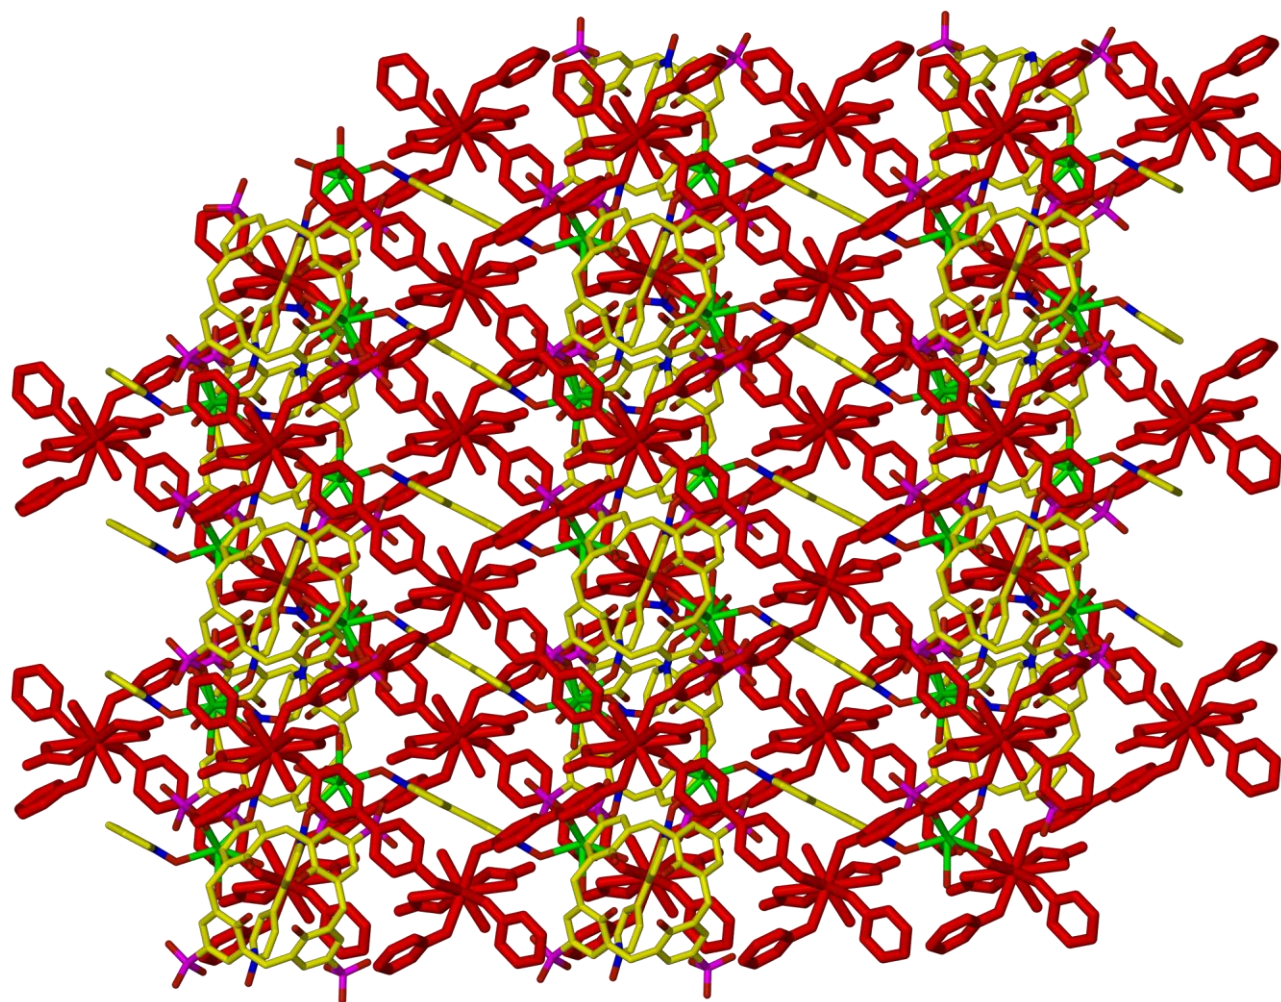

**Figure S1.** Displaying 1D-2D sandwich structure of **1**.

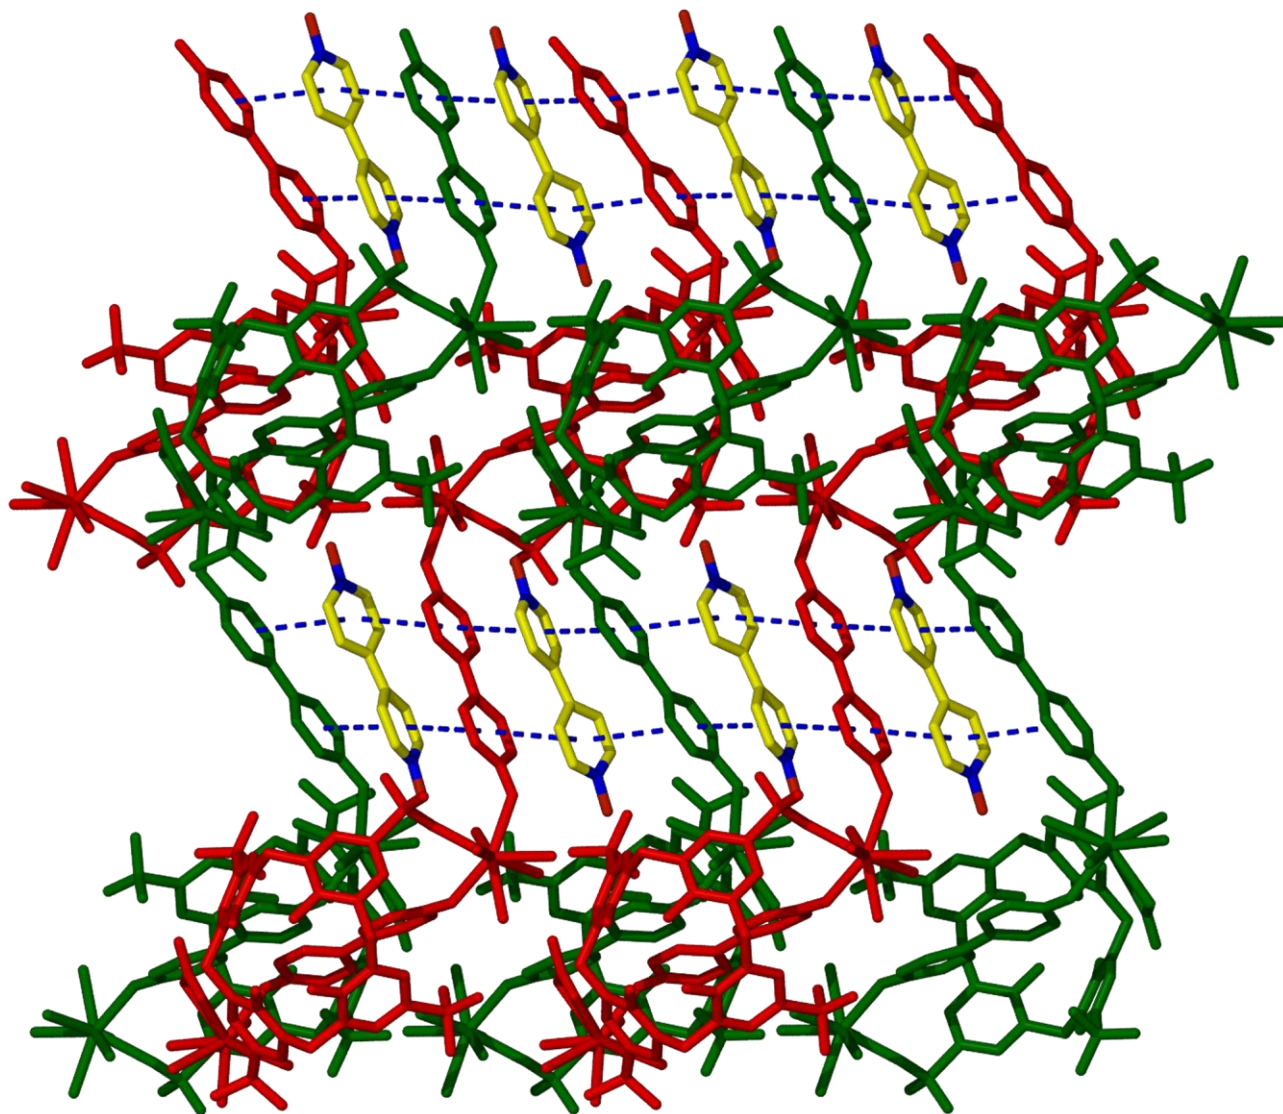

**Figure S2.** (a) Display of  $\pi \cdots \pi$  interaction (3.874-4.218 Å) between lattice 4,4'-bpdO and ligated 4,4'-bpdO molecules from the 1D chains of **1**. Neighbouring chains are shown in red and green colour to distinguish the 1D strands, whilst the lattice 4,4'-bpdO molecules are displayed in different colours in order to distinguish them from the ligated 4,4'-bpdO molecules.

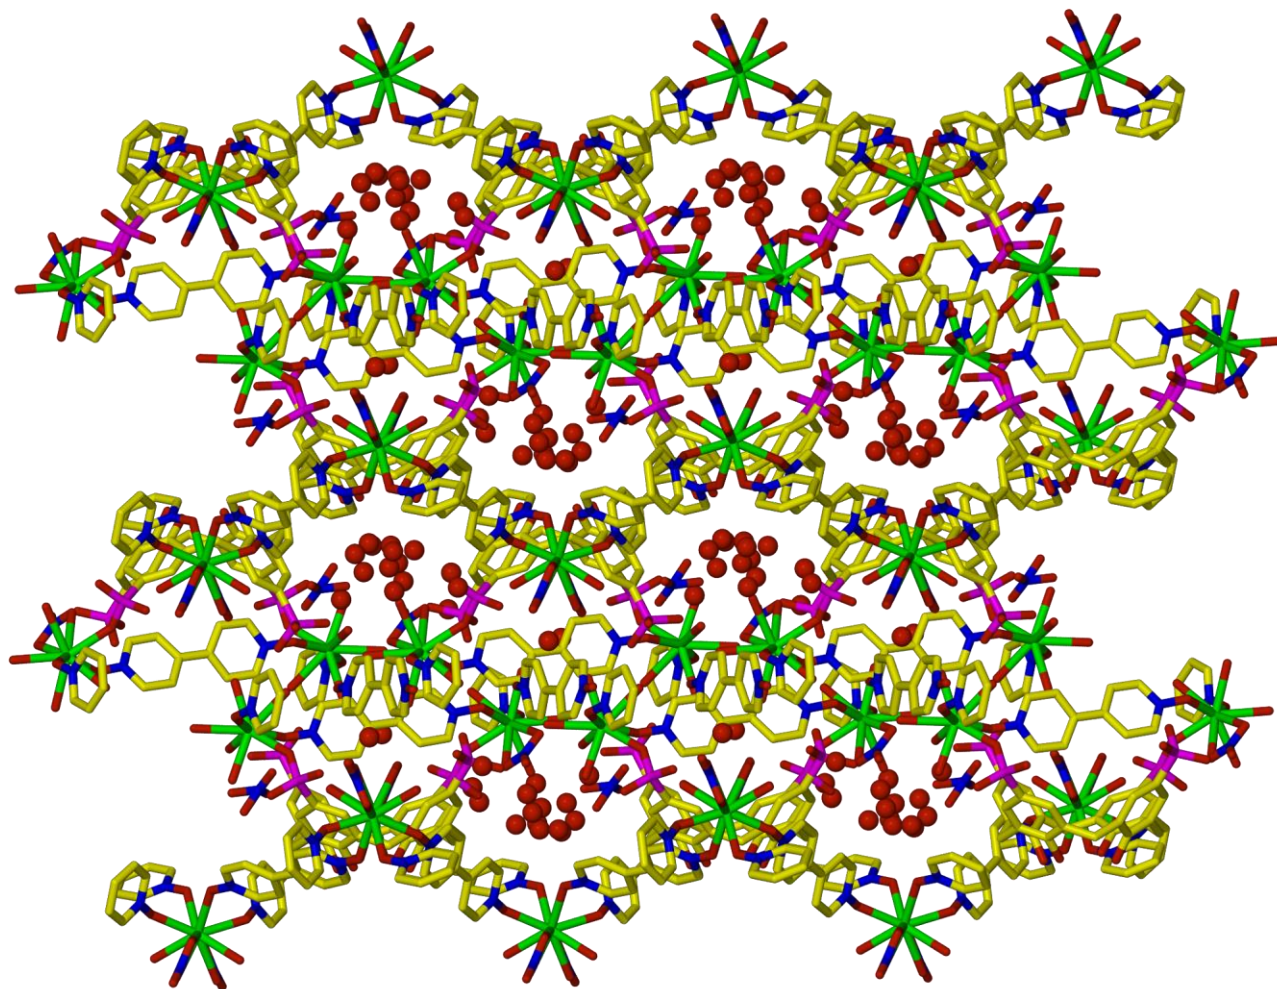

**Figure S3.** Display of hydrated channels in the crystal lattice as viewed down the *c*-axis. Red balls represent the oxygen atoms of the lattice water molecules.

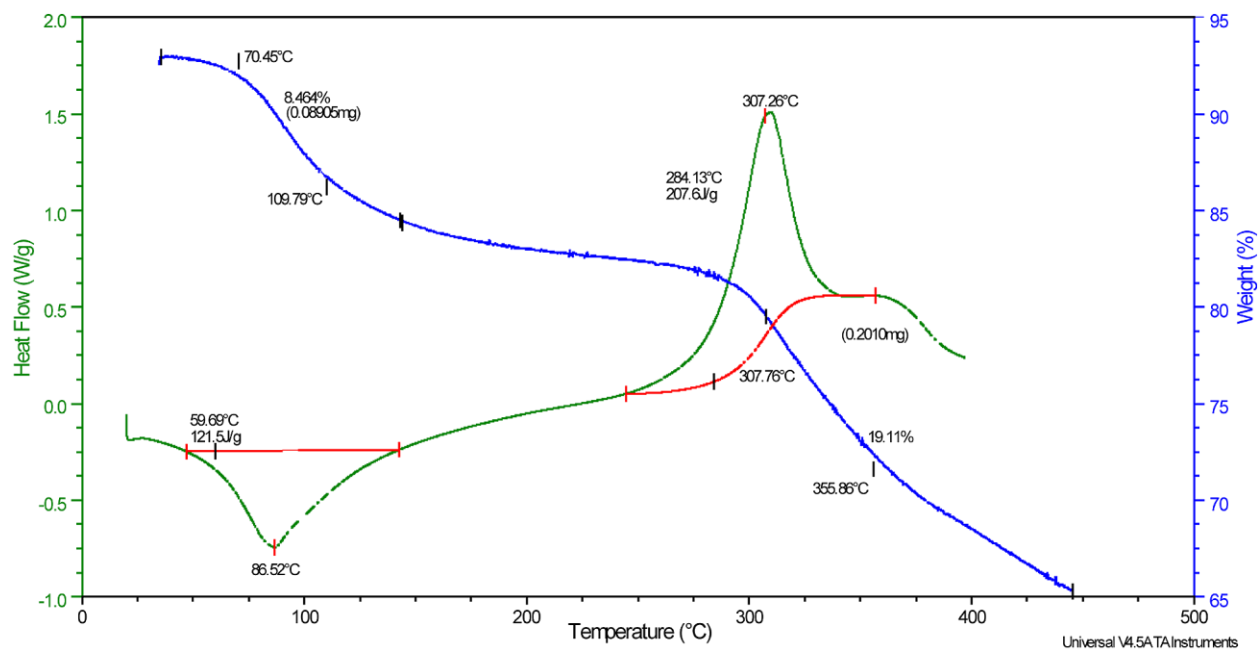

**Figure S4.** TGA and DSC curve for compound **1**.

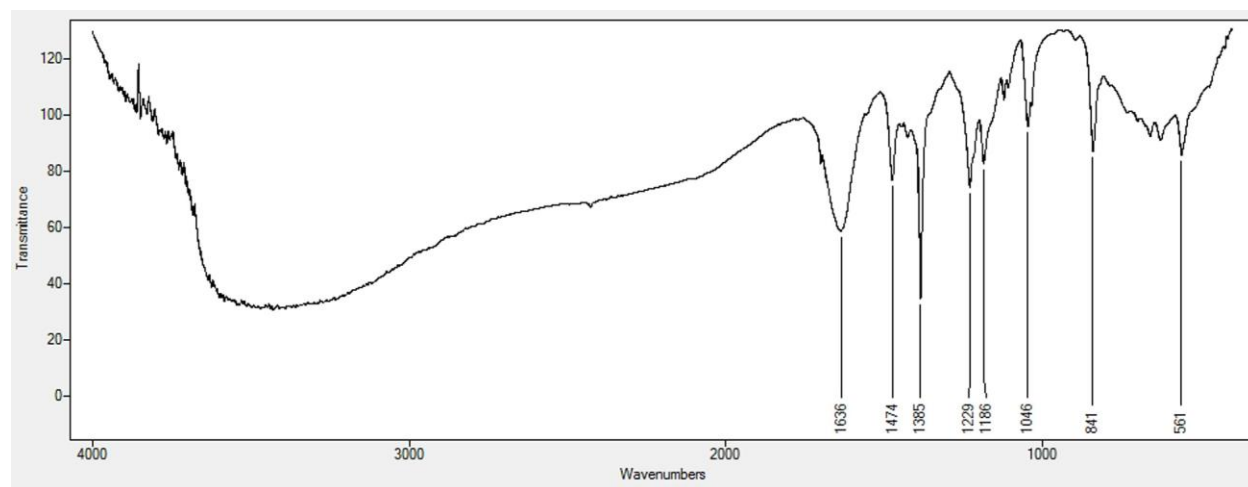

**Figure S5.** IR spectrum of compound **1**.

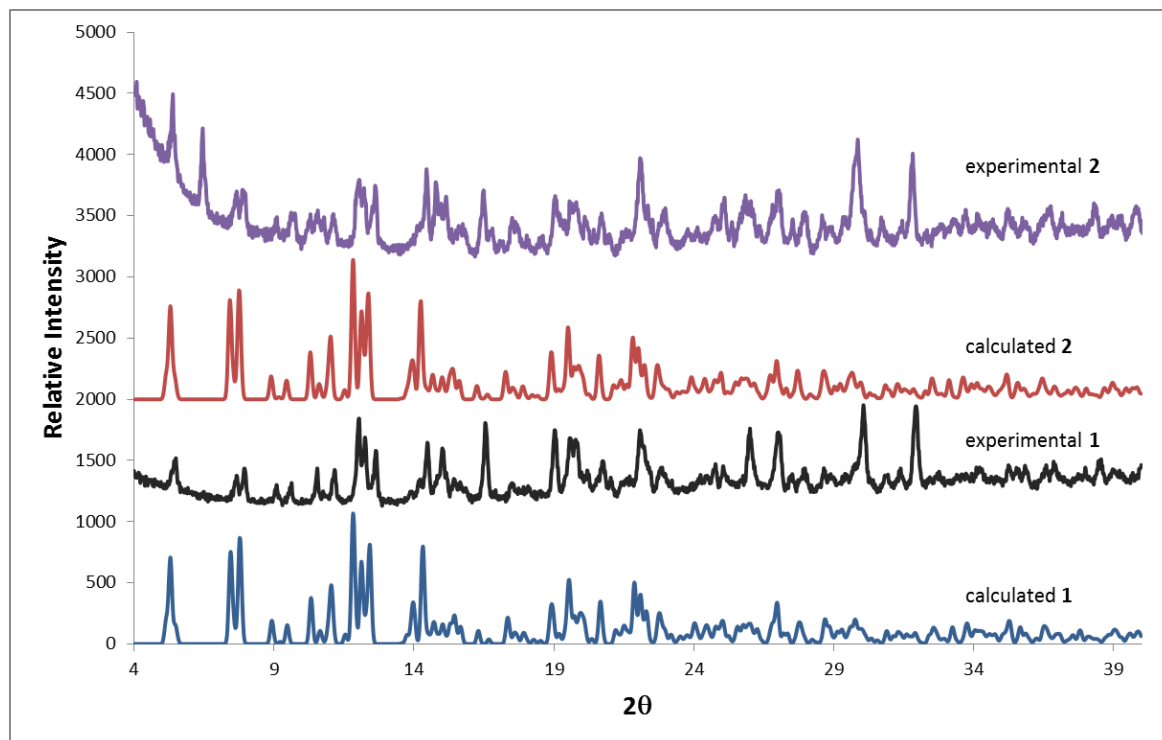

**Figure S6.** PXRD patterns of **1** and **2** compared with their respective calculated patterns

**Table S1.** Bond lengths [Å] for **1** and **2**.

| $C_{78}H_{105}N_{14}O_{61}S_4Sm_3$ ( <b>1</b> ) |          | $C_{78}H_{105}N_{14}O_{61}S_4Nd_3$ ( <b>2</b> ) |          |
|-------------------------------------------------|----------|-------------------------------------------------|----------|
| Sm(2)-O(19)                                     | 2.303(3) | Nd(1)-O(4)                                      | 2.446(4) |
| Sm(2)-O(13)                                     | 2.353(3) | Nd(1)-O(1)                                      | 2.447(4) |
| Sm(2)-O(14)                                     | 2.405(4) | Nd(1)-O(2)                                      | 2.464(4) |
| Sm(2)-O(20)                                     | 2.421(3) | Nd(1)-O(3)                                      | 2.489(4) |
| Sm(2)-O(17)                                     | 2.422(4) | Nd(1)-O(12)                                     | 2.509(4) |
| Sm(2)-O(16)                                     | 2.459(4) | Nd(1)-O(11)                                     | 2.533(4) |
| Sm(2)-O(18)                                     | 2.472(4) | Nd(1)-O(8)                                      | 2.620(4) |
| Sm(2)-O(15)                                     | 2.491(3) | Nd(1)-O(7)                                      | 2.628(4) |
| Sm(3)-O(36)                                     | 2.342(3) | Nd(1)-O(5)                                      | 2.667(4) |
| Sm(3)-O(44)                                     | 2.379(4) | Nd(1)-O(9)                                      | 2.692(4) |
| Sm(3)-O(27)                                     | 2.392(4) | Nd(2)-O(21)                                     | 2.364(4) |
| Sm(3)-O(41)                                     | 2.423(4) | Nd(2)-O(13)                                     | 2.417(4) |

|             |          |             |          |
|-------------|----------|-------------|----------|
| Sm(3)-O(40) | 2.458(4) | Nd(2)-O(35) | 2.428(4) |
| Sm(3)-O(43) | 2.460(4) | Nd(2)-O(15) | 2.453(4) |
| Sm(3)-O(42) | 2.538(4) | Nd(2)-O(16) | 2.488(4) |
| Sm(3)-O(38) | 2.554(4) | Nd(2)-O(14) | 2.488(4) |
| Sm(3)-O(37) | 2.651(4) | Nd(2)-O(17) | 2.573(4) |
| Sm(1)-O(3)  | 2.414(4) | Nd(2)-O(18) | 2.581(4) |
| Sm(1)-O(1)  | 2.416(4) | Nd(2)-O(19) | 2.668(4) |
| Sm(1)-O(2)  | 2.450(4) | Nd(3)-O(22) | 2.334(4) |
| Sm(1)-O(4)  | 2.453(4) | Nd(3)-O(28) | 2.394(4) |
| Sm(1)-O(5)  | 2.486(4) | Nd(3)-O(24) | 2.425(4) |
| Sm(1)-O(6)  | 2.507(4) | Nd(3)-O(29) | 2.442(4) |
| Sm(1)-O(7)  | 2.586(4) | Nd(3)-O(27) | 2.461(4) |
| Sm(1)-O(11) | 2.604(4) | Nd(3)-O(23) | 2.488(4) |
| Sm(1)-O(10) | 2.660(4) | Nd(3)-O(26) | 2.503(4) |
| Sm(1)-O(8)  | 2.675(4) | Nd(3)-O(25) | 2.521(4) |

**Table S2.** Bond angles [°] for **1** and **2**.

| $C_{78}H_{105}N_{14}O_{61}S_4Sm_3$ ( <b>1</b> ) |            | $C_{78}H_{105}N_{14}O_{61}S_4Nd_3$ ( <b>2</b> ) |            |
|-------------------------------------------------|------------|-------------------------------------------------|------------|
| O(19)-Sm(2)-O(13)                               | 152.75(13) | O(4)-Nd(1)-O(1)                                 | 75.17(14)  |
| O(19)-Sm(2)-O(14)                               | 93.36(14)  | O(4)-Nd(1)-O(2)                                 | 142.02(15) |
| O(13)-Sm(2)-O(14)                               | 91.07(14)  | O(1)-Nd(1)-O(2)                                 | 74.96(15)  |
| O(19)-Sm(2)-O(20)                               | 78.13(13)  | O(4)-Nd(1)-O(3)                                 | 73.81(14)  |
| O(13)-Sm(2)-O(20)                               | 81.19(13)  | O(1)-Nd(1)-O(3)                                 | 73.90(13)  |
| O(14)-Sm(2)-O(20)                               | 139.82(12) | O(2)-Nd(1)-O(3)                                 | 75.78(14)  |
| O(19)-Sm(2)-O(17)                               | 103.47(15) | O(4)-Nd(1)-O(12)                                | 67.75(14)  |
| O(13)-Sm(2)-O(17)                               | 87.60(14)  | O(1)-Nd(1)-O(12)                                | 141.87(14) |
| O(14)-Sm(2)-O(17)                               | 145.21(12) | O(2)-Nd(1)-O(12)                                | 132.69(15) |

|                   |            |                   |            |
|-------------------|------------|-------------------|------------|
| O(20)-Sm(2)-O(17) | 74.22(12)  | O(3)-Nd(1)-O(12)  | 87.28(14)  |
| O(19)-Sm(2)-O(16) | 64.99(13)  | O(4)-Nd(1)-O(11)  | 133.98(14) |
| O(13)-Sm(2)-O(16) | 142.25(12) | O(1)-Nd(1)-O(11)  | 87.72(14)  |
| O(14)-Sm(2)-O(16) | 84.87(14)  | O(2)-Nd(1)-O(11)  | 67.10(15)  |
| O(20)-Sm(2)-O(16) | 124.11(13) | O(3)-Nd(1)-O(11)  | 141.79(14) |
| O(17)-Sm(2)-O(16) | 75.41(14)  | O(12)-Nd(1)-O(11) | 124.63(14) |
| O(19)-Sm(2)-O(18) | 80.96(14)  | O(4)-Nd(1)-O(8)   | 77.63(14)  |
| O(13)-Sm(2)-O(18) | 75.45(13)  | O(1)-Nd(1)-O(8)   | 115.32(14) |
| O(14)-Sm(2)-O(18) | 69.59(12)  | O(2)-Nd(1)-O(8)   | 137.16(14) |
| O(20)-Sm(2)-O(18) | 70.30(12)  | O(3)-Nd(1)-O(8)   | 146.39(14) |
| O(17)-Sm(2)-O(18) | 142.48(12) | O(12)-Nd(1)-O(8)  | 65.48(15)  |
| O(16)-Sm(2)-O(18) | 136.04(13) | O(11)-Nd(1)-O(8)  | 71.77(14)  |
| O(19)-Sm(2)-O(15) | 134.31(12) | O(4)-Nd(1)-O(7)   | 138.46(14) |
| O(13)-Sm(2)-O(15) | 72.57(12)  | O(1)-Nd(1)-O(7)   | 145.89(14) |
| O(14)-Sm(2)-O(15) | 73.39(12)  | O(2)-Nd(1)-O(7)   | 75.85(15)  |
| O(20)-Sm(2)-O(15) | 138.45(12) | O(3)-Nd(1)-O(7)   | 115.13(14) |
| O(17)-Sm(2)-O(15) | 73.07(13)  | O(12)-Nd(1)-O(7)  | 72.15(14)  |
| O(16)-Sm(2)-O(15) | 70.30(12)  | O(11)-Nd(1)-O(7)  | 64.74(15)  |
| O(18)-Sm(2)-O(15) | 129.82(13) | O(8)-Nd(1)-O(7)   | 76.34(14)  |
| O(36)-Sm(3)-O(44) | 145.52(15) | O(4)-Nd(1)-O(5)   | 118.63(13) |
| O(36)-Sm(3)-O(27) | 80.78(13)  | O(1)-Nd(1)-O(5)   | 130.90(14) |
| O(44)-Sm(3)-O(27) | 95.63(14)  | O(2)-Nd(1)-O(5)   | 67.62(14)  |
| O(36)-Sm(3)-O(41) | 72.44(13)  | O(3)-Nd(1)-O(5)   | 67.08(12)  |
| O(44)-Sm(3)-O(41) | 88.16(15)  | O(12)-Nd(1)-O(5)  | 65.09(14)  |
| O(27)-Sm(3)-O(41) | 136.39(13) | O(11)-Nd(1)-O(5)  | 104.98(14) |
| O(36)-Sm(3)-O(40) | 126.53(13) | O(8)-Nd(1)-O(5)   | 113.70(13) |
| O(44)-Sm(3)-O(40) | 71.29(13)  | O(7)-Nd(1)-O(5)   | 48.27(13)  |



|                   |            |                   |            |
|-------------------|------------|-------------------|------------|
| O(27)-Sm(3)-O(40) | 147.99(13) | O(4)-Nd(1)-O(9)   | 69.05(13)  |
| O(41)-Sm(3)-O(40) | 73.82(13)  | O(1)-Nd(1)-O(9)   | 67.53(14)  |
| O(36)-Sm(3)-O(43) | 76.94(13)  | O(2)-Nd(1)-O(9)   | 118.81(14) |
| O(44)-Sm(3)-O(43) | 69.72(13)  | O(3)-Nd(1)-O(9)   | 131.62(13) |
| O(27)-Sm(3)-O(43) | 70.14(13)  | O(12)-Nd(1)-O(9)  | 105.56(14) |
| O(41)-Sm(3)-O(43) | 70.66(13)  | O(11)-Nd(1)-O(9)  | 64.93(14)  |
| O(40)-Sm(3)-O(43) | 127.13(13) | O(8)-Nd(1)-O(9)   | 48.02(13)  |
| O(36)-Sm(3)-O(42) | 136.42(14) | O(7)-Nd(1)-O(9)   | 113.21(13) |
| O(44)-Sm(3)-O(42) | 74.72(15)  | O(5)-Nd(1)-O(9)   | 160.27(12) |
| O(27)-Sm(3)-O(42) | 78.39(14)  | O(21)-Nd(2)-O(13) | 145.91(15) |
| O(41)-Sm(3)-O(42) | 143.35(14) | O(21)-Nd(2)-O(35) | 80.40(14)  |
| O(40)-Sm(3)-O(42) | 70.07(14)  | O(13)-Nd(2)-O(35) | 95.45(15)  |
| O(43)-Sm(3)-O(42) | 128.95(13) | O(21)-Nd(2)-O(15) | 72.75(15)  |
| O(36)-Sm(3)-O(38) | 71.97(12)  | O(13)-Nd(2)-O(15) | 88.27(17)  |
| O(44)-Sm(3)-O(38) | 136.23(12) | O(35)-Nd(2)-O(15) | 135.83(14) |
| O(27)-Sm(3)-O(38) | 117.80(12) | O(21)-Nd(2)-O(16) | 77.31(14)  |
| O(41)-Sm(3)-O(38) | 86.00(13)  | O(13)-Nd(2)-O(16) | 69.63(14)  |
| O(40)-Sm(3)-O(38) | 65.42(12)  | O(35)-Nd(2)-O(16) | 69.79(14)  |
| O(43)-Sm(3)-O(38) | 145.58(13) | O(15)-Nd(2)-O(16) | 70.50(14)  |
| O(42)-Sm(3)-O(38) | 84.71(13)  | O(21)-Nd(2)-O(14) | 126.52(14) |
| O(36)-Sm(3)-O(37) | 70.16(13)  | O(13)-Nd(2)-O(14) | 71.44(14)  |
| O(44)-Sm(3)-O(37) | 140.74(15) | O(35)-Nd(2)-O(14) | 148.37(14) |
| O(27)-Sm(3)-O(37) | 69.78(12)  | O(15)-Nd(2)-O(14) | 73.94(14)  |
| O(41)-Sm(3)-O(37) | 127.96(13) | O(16)-Nd(2)-O(14) | 127.09(14) |
| O(40)-Sm(3)-O(37) | 101.55(12) | O(21)-Nd(2)-O(17) | 136.35(15) |
| O(43)-Sm(3)-O(37) | 131.16(12) | O(13)-Nd(2)-O(17) | 74.16(16)  |
| O(42)-Sm(3)-O(37) | 66.81(13)  | O(35)-Nd(2)-O(17) | 78.52(15)  |

|                   |            |                   |            |
|-------------------|------------|-------------------|------------|
| O(38)-Sm(3)-O(37) | 48.68(11)  | O(15)-Nd(2)-O(17) | 143.57(16) |
| O(3)-Sm(1)-O(1)   | 75.42(13)  | O(16)-Nd(2)-O(17) | 128.34(15) |
| O(3)-Sm(1)-O(2)   | 142.89(14) | O(14)-Nd(2)-O(17) | 70.29(15)  |
| O(1)-Sm(1)-O(2)   | 75.12(13)  | O(21)-Nd(2)-O(18) | 72.19(14)  |
| O(3)-Sm(1)-O(4)   | 74.01(13)  | O(13)-Nd(2)-O(18) | 136.14(14) |
| O(1)-Sm(1)-O(4)   | 73.39(12)  | O(35)-Nd(2)-O(18) | 117.63(13) |
| O(2)-Sm(1)-O(4)   | 76.32(12)  | O(15)-Nd(2)-O(18) | 86.83(14)  |
| O(3)-Sm(1)-O(5)   | 67.87(13)  | O(16)-Nd(2)-O(18) | 146.30(14) |
| O(1)-Sm(1)-O(5)   | 142.14(13) | O(14)-Nd(2)-O(18) | 65.33(13)  |
| O(2)-Sm(1)-O(5)   | 132.48(13) | O(17)-Nd(2)-O(18) | 84.58(15)  |
| O(4)-Sm(1)-O(5)   | 87.61(13)  | O(21)-Nd(2)-O(19) | 70.01(13)  |
| O(3)-Sm(1)-O(6)   | 133.87(12) | O(13)-Nd(2)-O(19) | 140.32(15) |
| O(1)-Sm(1)-O(6)   | 88.02(13)  | O(35)-Nd(2)-O(19) | 69.85(13)  |
| O(2)-Sm(1)-O(6)   | 66.61(12)  | O(15)-Nd(2)-O(19) | 128.36(14) |
| O(4)-Sm(1)-O(6)   | 141.78(12) | O(16)-Nd(2)-O(19) | 131.22(14) |
| O(5)-Sm(1)-O(6)   | 124.27(13) | O(14)-Nd(2)-O(19) | 101.55(13) |
| O(3)-Sm(1)-O(7)   | 77.62(14)  | O(17)-Nd(2)-O(19) | 66.95(15)  |
| O(1)-Sm(1)-O(7)   | 116.11(13) | O(18)-Nd(2)-O(19) | 48.42(12)  |
| O(2)-Sm(1)-O(7)   | 136.43(13) | O(22)-Nd(3)-O(28) | 152.05(14) |
| O(4)-Sm(1)-O(7)   | 146.48(12) | O(22)-Nd(3)-O(24) | 93.70(15)  |
| O(5)-Sm(1)-O(7)   | 65.13(13)  | O(28)-Nd(3)-O(24) | 90.78(15)  |
| O(6)-Sm(1)-O(7)   | 71.71(13)  | O(22)-Nd(3)-O(29) | 77.79(15)  |
| O(3)-Sm(1)-O(11)  | 138.04(13) | O(28)-Nd(3)-O(29) | 81.03(14)  |
| O(1)-Sm(1)-O(11)  | 146.03(13) | O(24)-Nd(3)-O(29) | 139.76(13) |
| O(2)-Sm(1)-O(11)  | 75.62(14)  | O(22)-Nd(3)-O(27) | 103.29(15) |
| O(4)-Sm(1)-O(11)  | 115.49(12) | O(28)-Nd(3)-O(27) | 87.97(15)  |
| O(5)-Sm(1)-O(11)  | 71.72(13)  | O(24)-Nd(3)-O(27) | 145.49(14) |

|                   |            |                   |            |
|-------------------|------------|-------------------|------------|
| O(6)-Sm(1)-O(11)  | 64.61(13)  | O(29)-Nd(3)-O(27) | 73.96(14)  |
| O(7)-Sm(1)-O(11)  | 75.64(13)  | O(22)-Nd(3)-O(23) | 65.06(14)  |
| O(3)-Sm(1)-O(10)  | 118.68(12) | O(28)-Nd(3)-O(23) | 142.86(14) |
| O(1)-Sm(1)-O(10)  | 130.46(13) | O(24)-Nd(3)-O(23) | 85.64(15)  |
| O(2)-Sm(1)-O(10)  | 67.53(12)  | O(29)-Nd(3)-O(23) | 123.49(14) |
| O(4)-Sm(1)-O(10)  | 67.17(12)  | O(27)-Nd(3)-O(23) | 75.06(15)  |
| O(5)-Sm(1)-O(10)  | 65.01(12)  | O(22)-Nd(3)-O(26) | 80.84(14)  |
| O(6)-Sm(1)-O(10)  | 104.93(12) | O(28)-Nd(3)-O(26) | 74.92(15)  |
| O(7)-Sm(1)-O(10)  | 113.35(13) | O(24)-Nd(3)-O(26) | 69.68(13)  |
| O(19)-Sm(2)-O(13) | 152.75(13) | O(29)-Nd(3)-O(26) | 70.14(13)  |
| O(19)-Sm(2)-O(14) | 93.36(14)  | O(27)-Nd(3)-O(26) | 142.08(14) |
| O(13)-Sm(2)-O(14) | 91.07(14)  | O(23)-Nd(3)-O(26) | 136.43(14) |
| O(19)-Sm(2)-O(20) | 78.13(13)  | O(22)-Nd(3)-O(25) | 134.91(14) |
| O(13)-Sm(2)-O(20) | 81.19(13)  | O(28)-Nd(3)-O(25) | 72.69(13)  |
| O(14)-Sm(2)-O(20) | 139.82(12) | O(24)-Nd(3)-O(25) | 73.77(14)  |
| O(19)-Sm(2)-O(17) | 103.47(15) | O(29)-Nd(3)-O(25) | 138.01(13) |
| O(13)-Sm(2)-O(17) | 87.60(14)  | O(27)-Nd(3)-O(25) | 72.96(14)  |
| O(14)-Sm(2)-O(17) | 145.21(12) | O(23)-Nd(3)-O(25) | 70.82(13)  |
| O(20)-Sm(2)-O(17) | 74.22(12)  | O(26)-Nd(3)-O(25) | 130.03(13) |

**Table S3.** Hydrogen bond parameters for  $C_{78}H_{105}N_{14}O_{61}S_4Sm_3$  (**1**) [ $\text{\AA}$  and  $^\circ$ ].

| D-H $\cdots$ A                | d(H $\cdots$ A) | d(D $\cdots$ A) | $\angle$ (DHA) |
|-------------------------------|-----------------|-----------------|----------------|
| O(6)-HA $\cdots$ O(22)        | 2.05            | 2.735(5)        | 133.9          |
| O(43)-H(43B) $\cdots$ O(45)#7 | 1.92            | 2.635(5)        | 135.7          |
| O(40)-H(40B) $\cdots$ O(46)#8 | 1.94            | 2.700(6)        | 143.7          |
| O(15)-H(15B) $\cdots$ O(45)#5 | 1.88            | 2.668(5)        | 147.4          |
| O(41)-H(41A) $\cdots$ O(25)#8 | 1.97            | 2.878(7)        | 176.4          |

|                         |          |           |         |
|-------------------------|----------|-----------|---------|
| O(41)-H(41B)···O(56)    | 1.87     | 2.700(7)  | 150.5   |
| O(17)-H(17B)···O(21)    | 1.88     | 2.722(5)  | 159.5   |
| O(5)-HC···O(28)#9       | 2.13     | 2.734(5)  | 124.9   |
| O(5)-HB···O(55B)#10     | 2.1      | 2.872(12) | 145.3   |
| O(5)-HB···O(55A)#10     | 1.89     | 2.719(13) | 155.1   |
| O(14)-H(14)···O(29)#11  | 1.85     | 2.707(5)  | 163.8   |
| O(16)-H(16A)···O(39)#12 | 2.13     | 2.771(5)  | 129.4   |
| O(18)-H(18B)···O(46)    | 1.95     | 2.639(5)  | 133.7   |
| O(42)-H(42B)···O(26)    | 1.88     | 2.740(6)  | 156.9   |
| O(35)-H(35)···O(32)     | 1.87     | 2.656(7)  | 154.4   |
| O(32)-H(32)···O(33)     | 1.83     | 2.663(6)  | 172.1   |
| O(34)-H(34)···O(35)     | 1.78     | 2.574(6)  | 157.1   |
| O(53)-H(5AA)···O(24)    | 1.96(6)  | 2.743(7)  | 154(12) |
| O(53)-H(6AA)···O(52)    | 1.83(2)  | 2.672(8)  | 172(13) |
| O(51)-H(8AA)···O(31)#13 | 2.09(6)  | 2.892(6)  | 158(14) |
| O(54)-H(2AA)···O(45)#10 | 1.96     | 2.829(7)  | 177.2   |
| O(56)-H(0BA)···O(46)#8  | 2.16(10) | 2.865(8)  | 141(14) |
| O(57)-H(1BA)···O(61A)#8 | 2.18(10) | 2.883(16) | 139(14) |
| O(50)-H(3AA)···O(47)    | 2.04     | 2.872(10) | 159.1   |
| O(50)-H(4AA)···O(59)#10 | 2.15     | 2.768(14) | 128.1   |

Symmetry transformations used to generate equivalent atoms:

#1 -x+1,-y,-z #2 -x+2,-y,-z-1 #3 -x+1,-y,-z-1  
 #4 -x+2,-y,-z #5 -x+2,-y+1,-z #6 -x+1,-y+1,-z+2  
 #7 x,y,z+1 #8 -x+1,-y+1,-z+1 #9 x,y,z-1 #10 -x+1,-y+1,-z  
 #11 -x+2,-y+1,-z+1 #12 x+1,y,z #13 x-1,y,z

**Table S4.** Hydrogen bond parameters for C<sub>78</sub>H<sub>105</sub>N<sub>14</sub>O<sub>61</sub>S<sub>4</sub>Nd<sub>3</sub> (**2**) [Å and °].

| D-H···A | d(H···A) | d(D···A) | <(DHA) |
|---------|----------|----------|--------|
|---------|----------|----------|--------|

|                         |      |           |       |
|-------------------------|------|-----------|-------|
| C(1)-H(1)···O(50)#3     | 2.63 | 3.261(8)  | 124.1 |
| C(2)-H(2)···O(55)#7     | 2.61 | 3.554(12) | 173.2 |
| C(4)-H(4)···O(55)#8     | 2.57 | 3.510(10) | 170.6 |
| C(5)-H(5)···O(2)        | 2.35 | 3.154(7)  | 141.9 |
| C(5)-H(5)···O(11)       | 2.58 | 3.122(7)  | 116.4 |
| C(6)-H(6)···O(57A)#9    | 2.59 | 3.540(12) | 172.9 |
| C(10)-H(10)···O(47)#10  | 2.43 | 3.203(9)  | 137.9 |
| C(12)-H(12)···O(61B)#9  | 2.66 | 3.567(16) | 161   |
| C(15)-H(15)···O(4)      | 2.23 | 3.035(7)  | 142.5 |
| C(15)-H(15)···O(12)     | 2.54 | 3.073(7)  | 115.8 |
| C(16)-H(16)···O(56)#11  | 2.35 | 3.179(9)  | 146   |
| C(16)-H(16)···O(58B)#12 | 2.65 | 3.372(16) | 133.2 |
| C(21)-H(21)···O(58A)#12 | 2.64 | 3.397(15) | 137.2 |
| C(21)-H(21)···O(58B)#12 | 2.63 | 3.128(16) | 113.2 |
| C(22)-H(22)···O(58B)#12 | 2.28 | 2.971(17) | 129.1 |
| C(26)-H(26)···O(19)     | 2.38 | 3.119(8)  | 133.9 |
| C(30)-H(30)···O(34)#12  | 2.35 | 3.244(9)  | 156.9 |
| C(31)-H(31)···O(38)#8   | 2.34 | 3.284(7)  | 175.6 |
| C(32)-H(32)···O(18)#12  | 2.49 | 3.335(7)  | 147.9 |
| C(36)-H(36)···O(6)#8    | 2.48 | 3.357(8)  | 154   |
| C(37)-H(37)···O(47)#12  | 2.5  | 3.377(10) | 152.9 |
| C(39)-H(39)···O(47)#13  | 2.52 | 3.391(10) | 152.9 |
| C(39)-H(39)···O(48)#13  | 2.59 | 3.290(9)  | 130.5 |
| C(40)-H(40)···O(30)     | 2.58 | 3.399(7)  | 143.9 |
| C(41)-H(41A)···O(9)#14  | 2.52 | 3.421(7)  | 157.5 |
| C(43)-H(43A)···O(27)    | 2.64 | 3.481(7)  | 148.3 |
| C(56)-H(56)···O(19)     | 2.35 | 3.240(7)  | 155.9 |

|                          |         |           |         |
|--------------------------|---------|-----------|---------|
| C(58)-H(58)···O(5)       | 2.49    | 3.380(7)  | 156.1   |
| C(69)-H(69)···O(31)#12   | 2.25    | 3.192(8)  | 173.6   |
| C(70)-H(70)···O(8)#5     | 2.55    | 3.169(7)  | 123     |
| C(72)-H(72)···O(60B)#12  | 2.54    | 3.491(18) | 177.5   |
| C(73)-H(73)···O(54)#12   | 2.41    | 3.356(9)  | 170.9   |
| C(74)-H(74)···O(37)#5    | 2.21    | 3.147(7)  | 170.3   |
| C(75)-H(75)···O(7)#5     | 2.63    | 3.150(8)  | 114.6   |
| C(75)-H(75)···O(8)#5     | 2.57    | 3.500(8)  | 167.3   |
| C(77)-H(77)···O(60B)#12  | 2.59    | 3.497(18) | 159.7   |
| O(24)-H(24A)···S(4)#8    | 2.97(4) | 3.801(4)  | 161(9)  |
| O(24)-H(24A)···O(38)#8   | 1.86(2) | 2.725(6)  | 174(9)  |
| O(12)-H(12A)···O(37)     | 1.94(5) | 2.739(6)  | 153(11) |
| O(11)-H(11B)···O(31)#11  | 1.88(3) | 2.726(6)  | 168(9)  |
| O(12)-H(12B)···O(58A)#12 | 2.10(6) | 2.875(12) | 149(9)  |
| O(12)-H(12B)···O(58B)#12 | 1.86(3) | 2.720(15) | 174(11) |
| O(25)-H(25B)···O(46)#13  | 1.93    | 2.681(6)  | 142.5   |
| O(24)-H(24B)···O(51)#10  | 1.87(6) | 2.662(6)  | 148(11) |
| O(17)-H(17A)···O(54)#12  | 2.17(6) | 2.937(8)  | 144(9)  |
| O(17)-H(17B)···S(3)      | 2.97(9) | 3.532(5)  | 124(8)  |
| O(17)-H(17B)···O(36)     | 1.99(7) | 2.745(7)  | 143(10) |
| O(50)-H(50A)···O(33)     | 1.93(4) | 2.749(7)  | 159(10) |
| O(50)-H(50B)···O(57A)#12 | 1.98(6) | 2.727(11) | 145(9)  |
| O(50)-H(50B)···O(57B)#12 | 1.85(3) | 2.707(14) | 171(10) |
| O(52)-H(52A)···O(40)#15  | 2.23(8) | 2.910(7)  | 136(10) |
| O(52)-H(52B)···O(17)     | 2.20(6) | 2.988(7)  | 150(9)  |
| O(51)-H(51A)···O(6)#12   | 2.20(8) | 2.921(7)  | 138(10) |
| O(51)-H(51B)···O(46)#14  | 1.98(3) | 2.840(8)  | 163(9)  |

Symmetry transformations used to generate equivalent atoms:

#1  $-x+2, -y, -z+2$  #2  $-x+2, -y, -z+1$  #3  $-x+1, -y, -z+1$   
#4  $-x+1, -y, -z+2$  #5  $-x+1, -y+1, -z+2$  #6  $-x+2, -y+1, -z$   
#7  $x, y-1, z+1$  #8  $-x+2, -y+1, -z+1$  #9  $x, y-1, z$   
#10  $x+1, y, z$  #11  $x, y, z+1$  #12  $-x+1, -y+1, -z+1$   
#13  $x+1, y, z-1$  #14  $x, y, z-1$  #15  $x-1, y, z$
